# Supplementary material
Source: HighWire-hosted journal article supplement (http://bmjopenquality.bmj.com/highwire/filestream/136131/field_highwire_adjunct_files/0/ds3497.pdf)
Supplement: ds3497.pdf [file ds3497.pdf]

# Baseline Measurement

## Baseline Survey Data

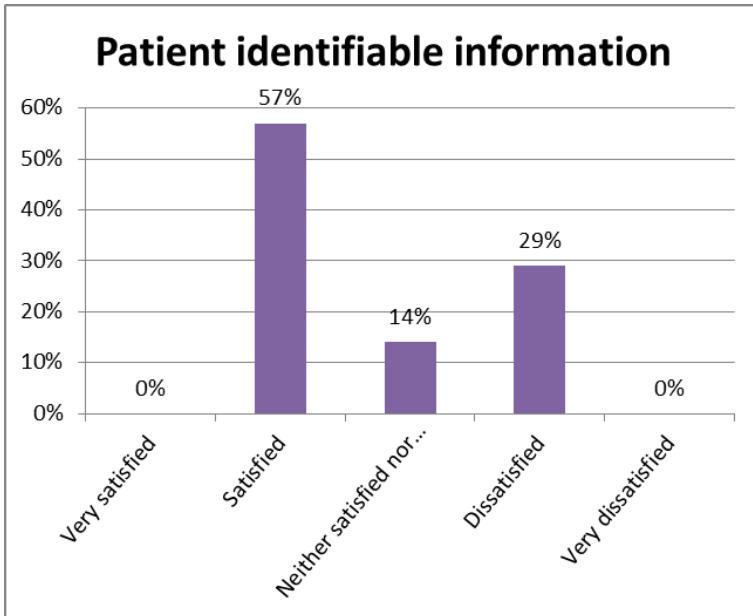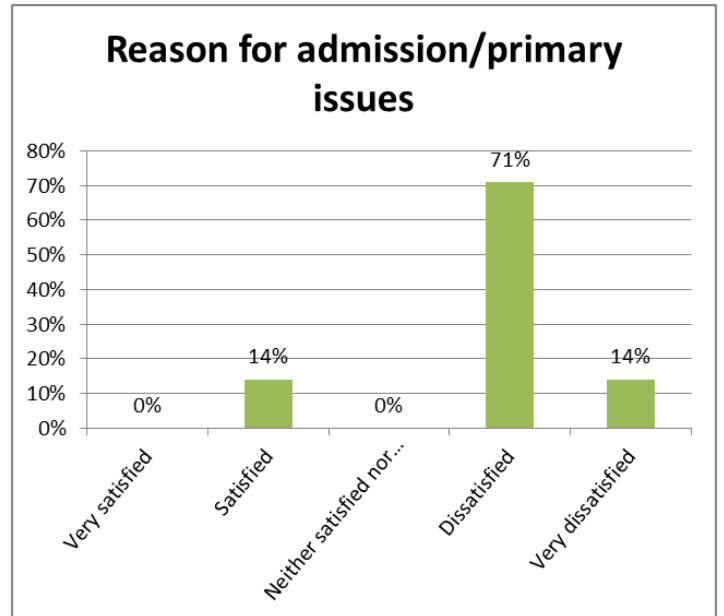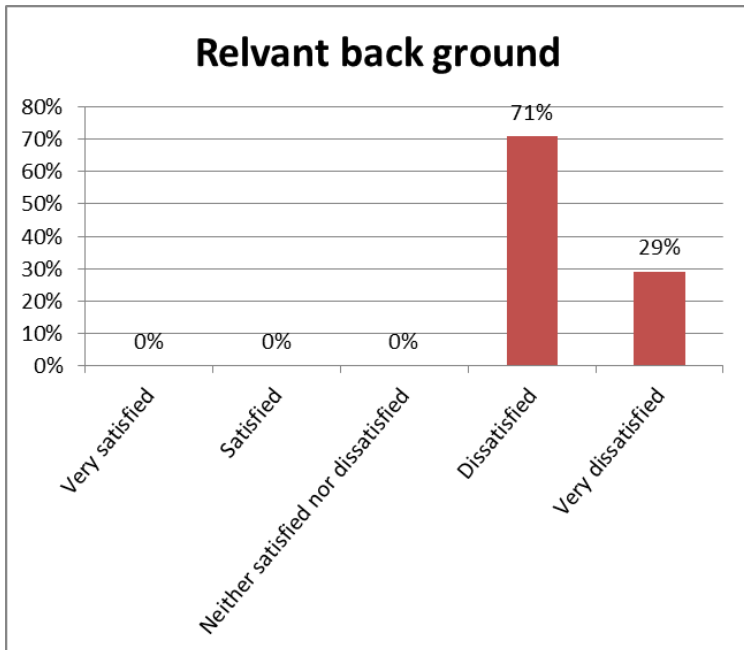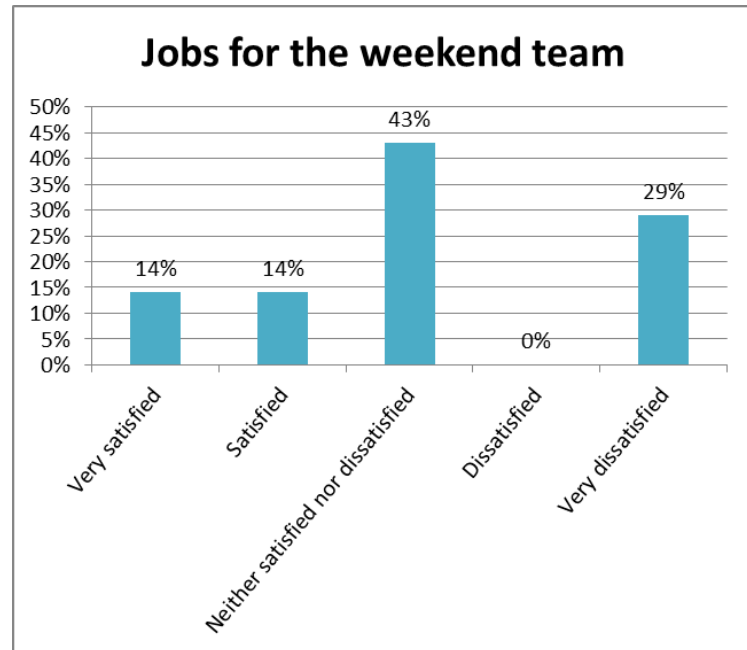

### Majority of requests made were inappropriate

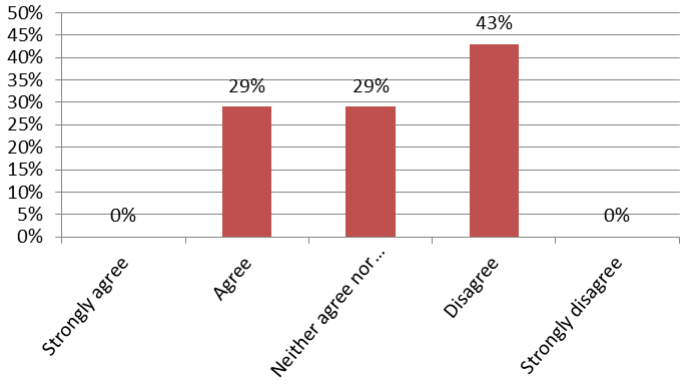

### Provided with sufficient handover information

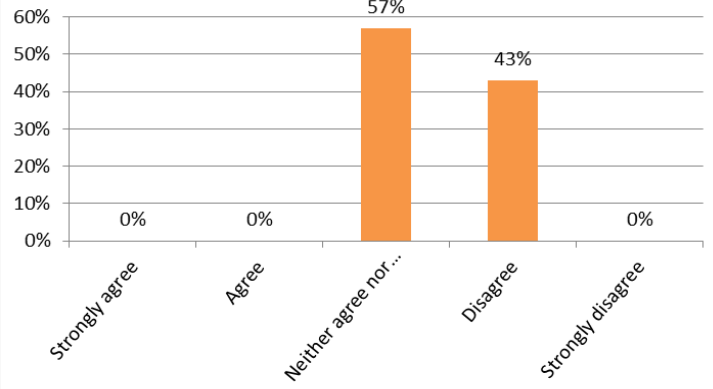

### Had a clear idea of what the plan was for each job

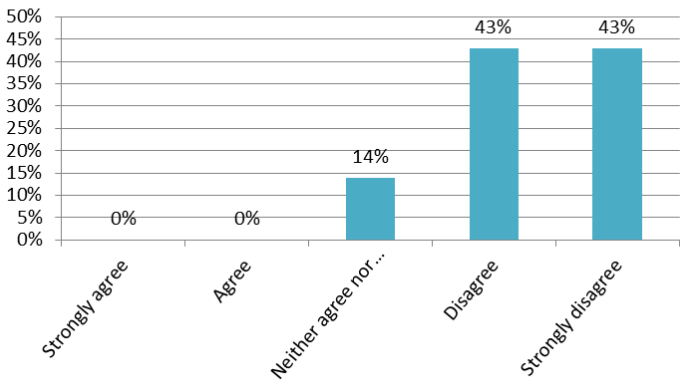

### Current handover contributed to my stress levels

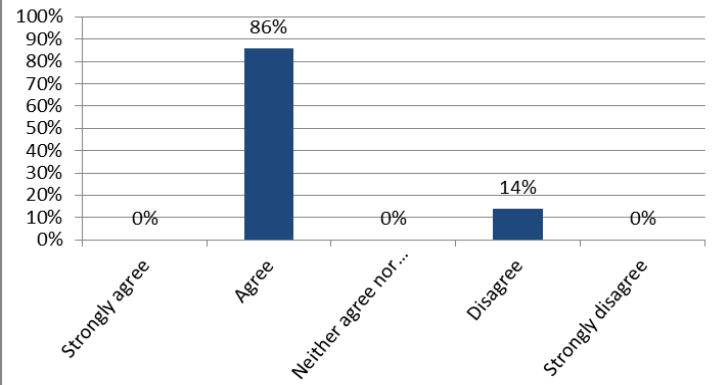

### Had to work additional hours to complete all my tasks

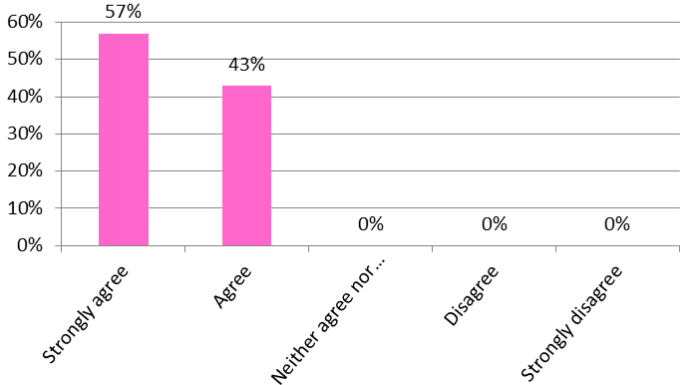

### Spent a dis-proportionate amount of time reviewing patient's notes

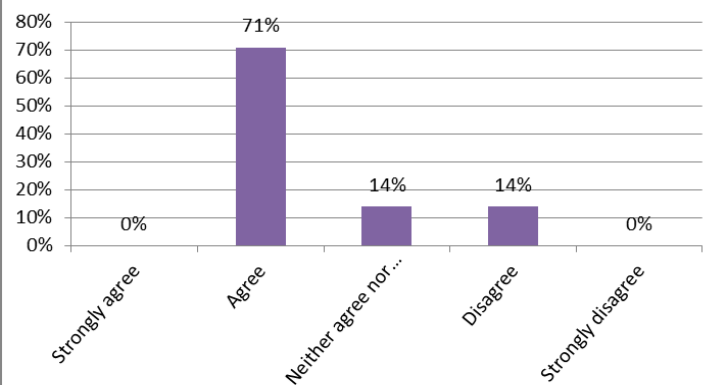

### Satisfied with current handover

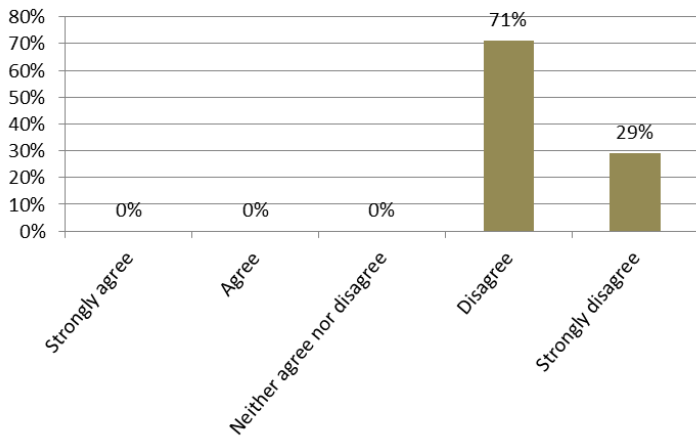

**100% of junior doctors surveyed are not satisfied with the current handover**

**71% of junior doctors surveyed believe the current handover compromised patient safety**

### Current handover compromised patient safety

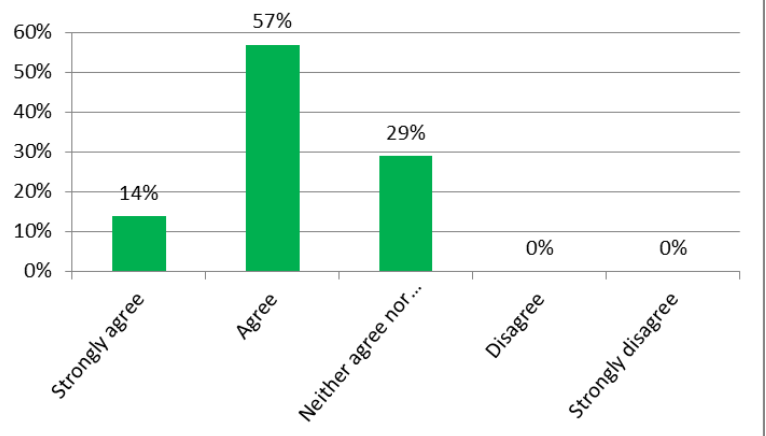

### Analysis of handover data

|                                              | Weekend 1<br>23 <sup>rd</sup> – 24 <sup>th</sup> Nov 2013 | Weekend 2<br>30 <sup>th</sup> – 1 <sup>st</sup> Dec 2013 |
|----------------------------------------------|-----------------------------------------------------------|----------------------------------------------------------|
| Patient name                                 | 100.0%                                                    | 100.0%                                                   |
| Patient identifiers (hospital number or DOB) | 68.8%                                                     | 71.4%                                                    |
| Ward                                         | 93.8%                                                     | 100.0%                                                   |
| Background/relevant PMH                      | 62.5%                                                     | 92.9%                                                    |
| Main issues                                  | 81.3%                                                     | 85.7%                                                    |
| Job for weekend                              | 100.0%                                                    | 100.0%                                                   |
| Was a plan present?                          | 37.5%                                                     | 57.1%                                                    |
| Easy to distinguish between days?            | 87.5%                                                     | 85.7%                                                    |

Main problem areas
